# Supplementary material for: ErbB-2 signals through Plexin-B1 to promote breast cancer metastasis
Source: JCI journal article supplement (doi:10.1172/jci60568), 2012-03-01
Supplement: sd1 [file 1]

**Supplementary Figure 1.** Activation of RhoC downstream of ErbB-2 is mediated by Plexin-B1. HEK293 cells were transfected with VSV-Plexin-B1 as well as HA-RhoC and FLAG-PDZ-RhoGEF. Where indicated, cells were additionally transfected with wildtype ErbB-2 (ErbB-2 WT), or a Plexin-B1 deletion construct which lacks the intracellular domain (PlxB1 $\Delta$ C). After incubation without or with 150 nM Sema4D for 20 min, active RhoC was precipitated (pulldown) and precipitates were immunoblotted (IB) using an anti-HA-antibody.

**Supplementary Figure 2.** (A) Knockdown of ErbB-2 does not affect active R-Ras levels. BT-474 cells were transfected with control or ErbB-2 siRNA. 48h later, cells were lysed, active R-Ras was immunoprecipitated (pulldown) and precipitates were immunoblotted using an anti-R-Ras antibody. (B-C) Stable knockdown of Plexin-B1 impairs migration and invasion of BT-474 cells. Using a lentiviral system, BT-474 cells were stably transfected with control shRNA or shRNAs directed against Plexin-B1. (B) 24 h after seeding onto non-coated filters or (C) 48h after seeding onto Matrigel-coated filters, cells on the upper side of the filters were removed and cells on the bottom side of the filter were counted as described in Methods. (D) SiRNA-mediated knockdown of RhoA or RhoC reduces invasiveness of BT-474 cells. BT-474 cells transfected with control, RhoA or RhoC siRNA were seeded onto Matrigel-coated filters. 48h later, non-invading cells were removed and invading cells were counted. (E-H) The mouse monoclonal anti-Plexin-B1 antibody (clone #93) interferes with the interaction between ErbB-2 and Plexin-B1, but does not inhibit binding of Sema4D to Plexin-B1. Uncoupling of ErbB-2 and Plexin-B1 by the mouse monoclonal anti-Plexin-B1 antibody (clone #93)

or the soluble extracellular domain of Plexin-B1 (PlxB1ext) reduces tyrosine phosphorylation of Plexin-B1. **(E)** BT-474 cells were incubated with the indicated concentrations of a mouse monoclonal anti-Plexin-B1 antibody (anti-PlxB1; clone #93) for 60 min. Thereafter, cells were lysed, ErbB-2 was immunoprecipitated using an anti-ErbB-2 antibody (IP) and Plexin-B1 was immunoprecipitated using an anti-Plexin-B1 antibody (R&D Systems; IP). Precipitates were immunoblotted (IB) with antibodies directed against Plexin-B1 (R&D Systems), phospho-tyrosine (pTyr), or ErbB-2. **(F)** HEK293 cells were transfected with 3DA.Luc and plasmids encoding Plexin-B1 and PDZ-RhoGEF. 3DA.Luc represents a reporter plasmid expressing firefly luciferase under the control of a mutant serum response element (SRE) which is activated downstream of active RhoA. After incubation with the indicated concentrations of the mouse monoclonal anti-Plexin-B1 antibody (clone #93) for 60 min, cells were treated with 150 nM Sema4D for 4h and firefly luciferase activity corresponding to RhoA activity was determined as described in materials and methods. **(G)** MCF-7 cells expressing endogenous Plexin-B1 were incubated with the indicated concentrations of the mouse monoclonal anti-Plexin-B1 antibody (clone #93) for 1 hour. After washing with PBS, cells were treated with myc-Sema4D for 30 min. After removal of unbound myc-Sema4D by washing, cells were incubated with an HRP-conjugated anti-myc antibody for 30 min, washed, and HRP-activity was determined as described in materials and methods. **(H)** BT-474 cells were incubated with the indicated concentrations of the soluble extracellular domain of Plexin-B1 (PlxB1ext) for 45 min. Thereafter, cells were lysed, Plexin-B1 was immunoprecipitated using an anti-Plexin-B1 antibody (R&D

Systems; IP) and precipitates were immunoblotted (IB) with antibodies directed against Plexin-B1 (R&D Systems), phospho-tyrosine (pTyr), or ErbB-2.

**Supplementary Figure 3.** Plexin-B1 promotes invasion of ErbB-2-overexpressing human ovarian cancer cells. **(A)** SK-OV-3 cells were incubated with the indicated concentrations of a mouse monoclonal anti-Plexin-B1 antibody (anti-PlxB1; clone #93) for 60 min. After cell lysis ErbB-2 was immunoprecipitated using an anti-ErbB-2 antibody (IP) and Plexin-B1 was immunoprecipitated using an anti-Plexin-B1 antibody (R&D Systems; IP). Precipitates were immunoblotted (IB) with antibodies directed against phospho-tyrosine (pTyr), ErbB-2 or Plexin-B1. **(B)** SK-OV-3 cells were incubated without or with a mouse monoclonal anti-Plexin-B1 antibody (anti-PlxB1; clone #93, 1.8 ng/ $\mu$ l) for 60 min. Thereafter, cells were lysed and the amounts of active RhoA and RhoC were determined as described (pulldown). **(C)** SK-OV-3 cells were seeded onto Matrigel-coated filters in the absence or presence of a mouse monoclonal anti-Plexin-B1 antibody (anti-PlxB1; clone #93, 1.8 ng/ $\mu$ l). 16h later, non-invading cells were removed, and invading cells were counted. Data are presented as mean  $\pm$  S.D. with statistical significances determined by t-test; \*\*,  $p \leq 0.01$ .

**Supplementary Figure 4.** Analysis of MMTVneu primary tumors. **(A)** RNA from primary tumor and lung metastasis was isolated and reverse transcribed (RT, reverse transcriptase). PCR analysis was carried out using primers specific for Plexin-B1. Primers for beta-actin were used as control. **(B,C)** Apoptosis, **(D,E)** vascularization, **(F,G)** macrophage infiltration, **(H,I)** phospho-ErbB-2 score, **(J,K)** grading and **(L,M)** local

invasiveness (**Plexin-B1 WT, n = 7; Plexin-B1 KO, n = 13**) of MMTVneu primary tumors. Representative pictures are shown in (**B,D,F,H,J,L**), quantifications of the results are provided in (**C,E,G,I,K,M**). Arrows point to (**B**) apoptotic cells positive for cleaved-caspase-3 (blue), (**D**) CD-31-positive blood vessels (red), (**F**) Mac-3-positive macrophages (red), (**J**) mitotic figures. The invasion front is marked by white dashed lines in (**L**). Scale bars represent 200  $\mu\text{m}$  in (**D**), 40  $\mu\text{m}$  in (**H**), 20  $\mu\text{m}$  in (**B,F,J,L**).

**Supplementary Figure 5.** Kaplan-Meier graphs representing the disease-free survival of patients with (**A**) ErbB-2-negative breast cancer (Plexin-B1 high: n=62, Plexin-B1 low: n=19), (**B**) ErbB-2-positive, ER-positive breast cancer (Plexin-B1 high: n=15, Plexin-B1 low: n=15), (**C**) ErbB-2-positive, ER-negative breast cancer (Plexin-B1 high: n=14, Plexin-B1 low: n=14). Black, high Plexin-B1 expression (Plexin-B1 high); grey, low Plexin-B1 expression (Plexin-B1 low). Statistical significances were tested by log-rank-test.

**Supplementary Table 1.** Characteristics of breast cancer patients of whom (**A**) frozen breast cancer tissue was obtained for RT-PCR, (**B**) paraffin-embedded breast cancer tissue was obtained for immunohistochemistry, (**C**) frozen breast cancer tissue was obtained for immunoprecipitation and Western Blot.

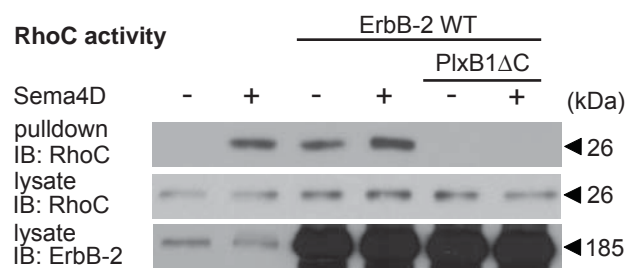

Supplementary Fig. 1, Worzfeld et al.

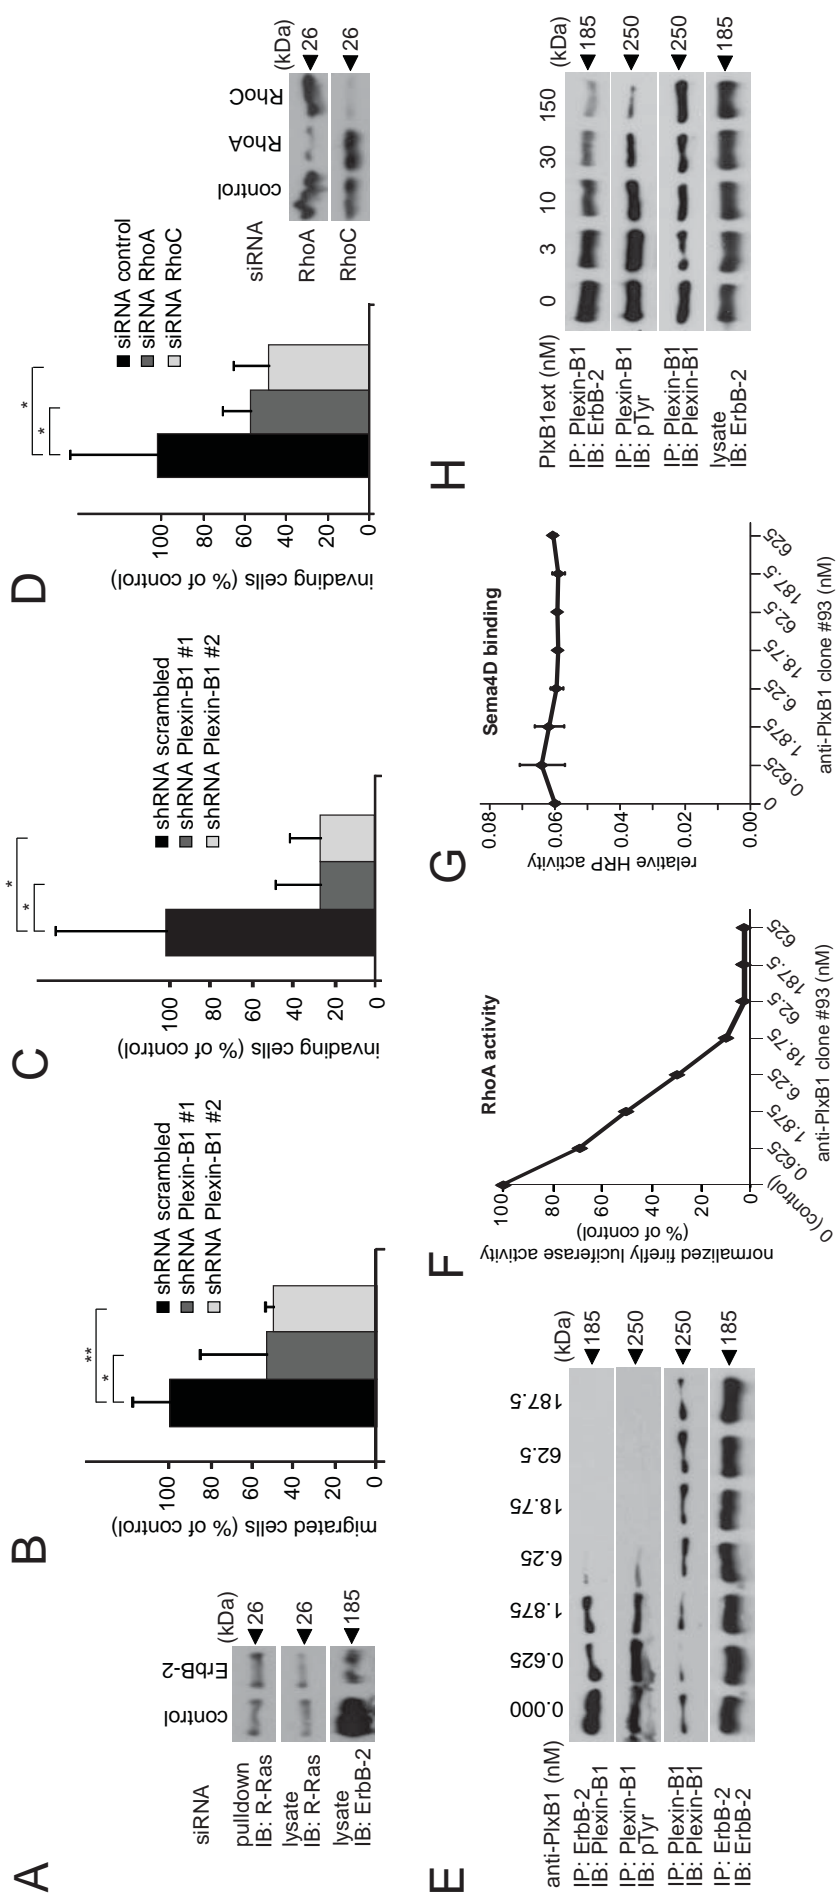

Supplementary Figure 2, Worzfeld et al.

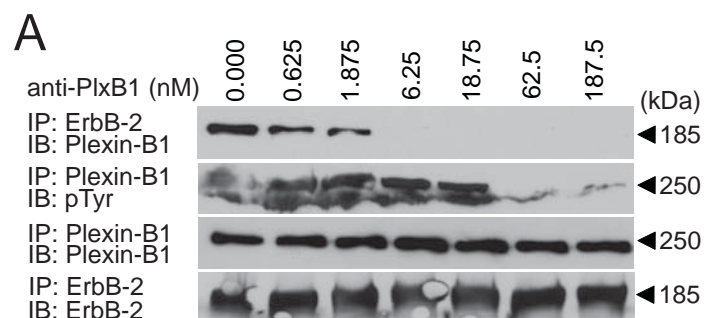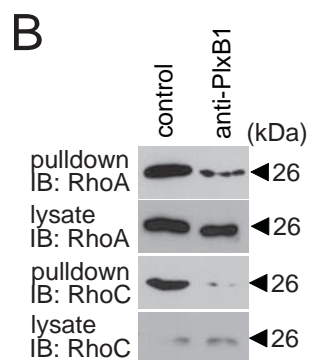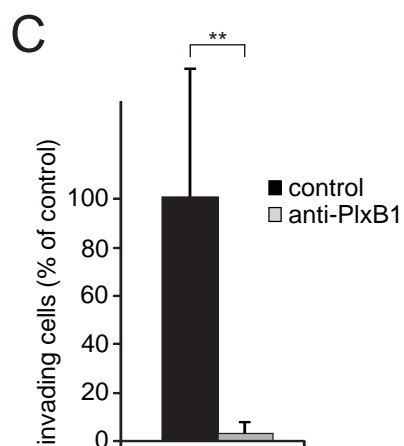

Supplementary Figure 3, Worzfeld et al.

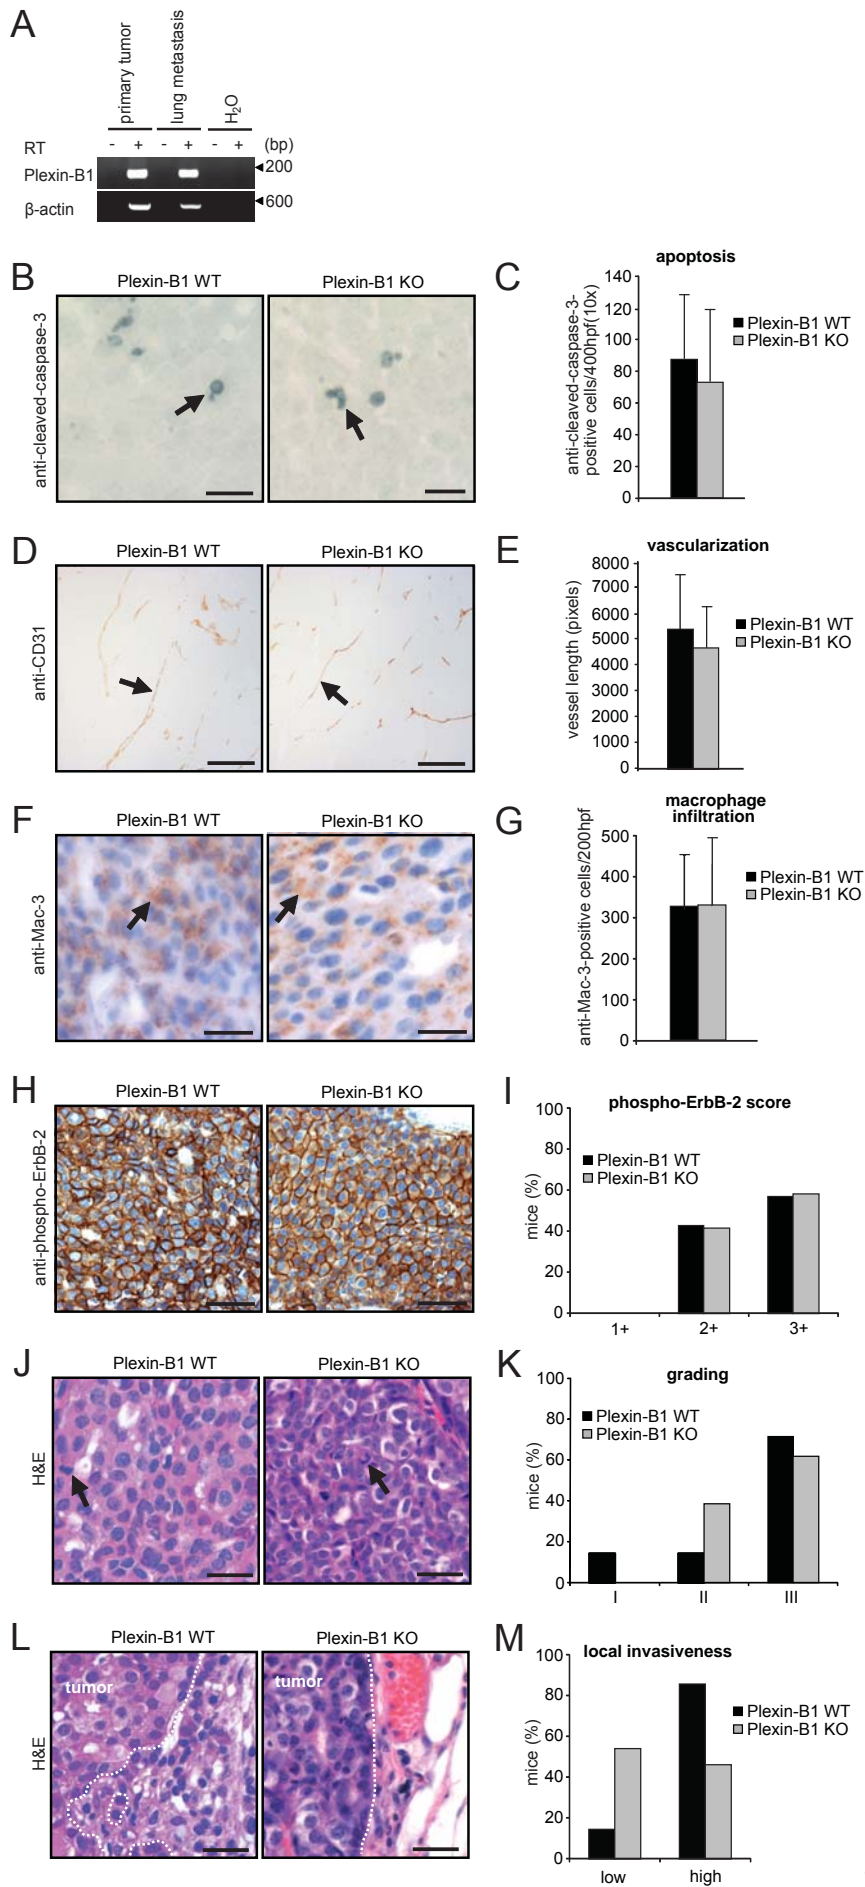

Supplementary Figure 4,  
Worzfeld et al.



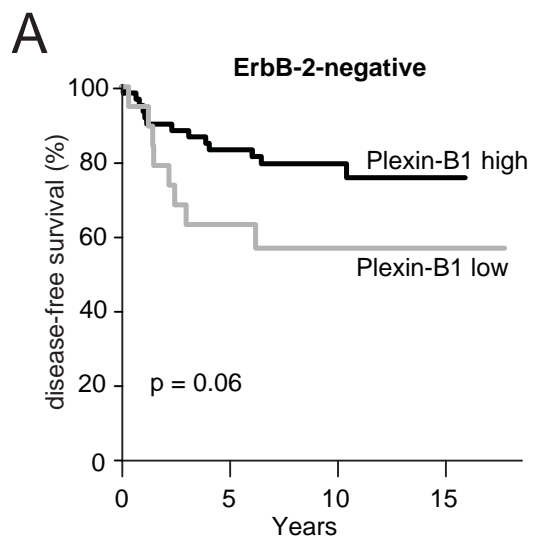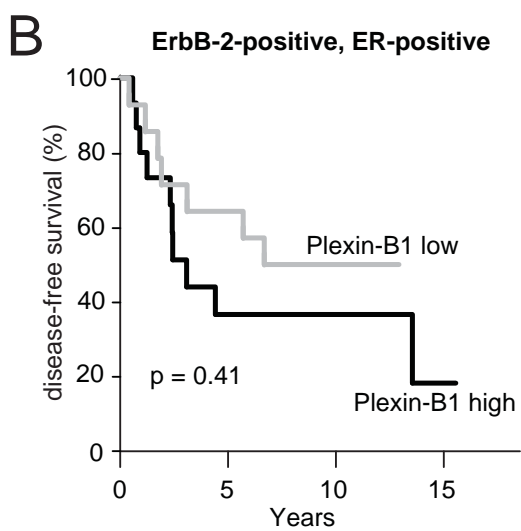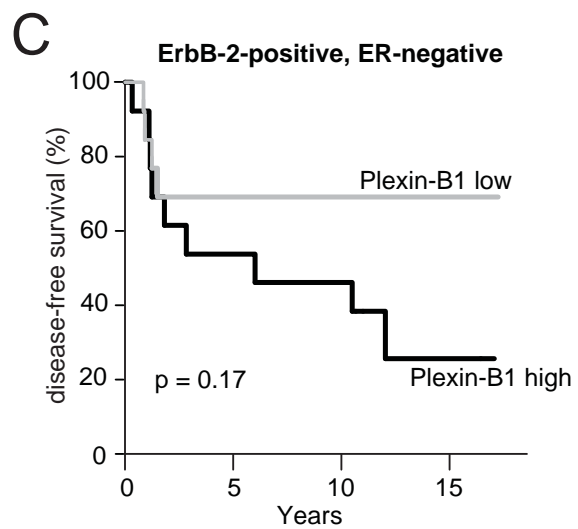

A

| patient ID | DOB        | histopathology             | T     | N           | grade | ErbB-2 score |
|------------|------------|----------------------------|-------|-------------|-------|--------------|
| 2005       | 05/26/1954 | invasive ductal carcinoma  | 1c    | 0 (0/19)    | 3     | 0            |
| 2030       | 03/13/1928 | invasive ductal carcinoma  | 1c    | 0 (0/23)    | 1     | 0            |
| 2051       | 07/01/1930 | invasive lobular carcinoma | 3 (m) | 2           | 3     | 0            |
| 1900       | 08/14/1941 | invasive ductal carcinoma  | 2     | 0 (0/22)    | 3     | 3+           |
| 1935       | 06/14/1953 | invasive ductal carcinoma  | 2     | 0 (0/21)    | 3     | 3+           |
| 2004       | 11/27/1940 | invasive ductal carcinoma  | 2     | 1 bi (1/21) | 3     | 3+           |

B

| patient ID | histopathology            | ErbB-2 score |
|------------|---------------------------|--------------|
| 3541       | invasive ductal carcinoma | 0            |
| 16897      | invasive ductal carcinoma | 3+           |

C

| patient ID | histopathology               | grade | ErbB-2 score |
|------------|------------------------------|-------|--------------|
| 372        | invasive lobular carcinoma   | G2    | 0            |
| 664        | invasive ductal carcinoma    | G2    | 0            |
| 1635       | invasive medullary carcinoma | G3    | 0            |
| 4738       | invasive ductal carcinoma    | G2    | 0            |
| 5499       | invasive ductal carcinoma    | G2    | 1+           |
| 654        | invasive ductal carcinoma    | G2    | 1+           |
| 3531       | invasive ductal carcinoma    | G2    | 2+           |
| 4353       | invasive ductal carcinoma    | G2    | 3+           |
| 1610       | invasive medullary carcinoma | G3    | 3+           |
|            |                              |       |              |
| 102        | invasive ductal carcinoma    | G2    | 0            |
| 934        | invasive lobular carcinoma   | G2    | 0            |
| 851        | invasive ductal carcinoma    | G2    | 0            |
| 5809       | invasive ductal carcinoma    | G2    | 0            |
| 3405       | invasive mucinous carcinoma  | G2    | 1+           |
| 1048       | invasive ductal carcinoma    | G3    | 1+           |
| 3156       | invasive ductal carcinoma    | G3    | 2+           |
| 5939       | invasive ductal carcinoma    | G2    | 3+           |
| 4017       | invasive ductal carcinoma    | G2    | 3+           |
